# Supplementary material
Source: publisher figshare collection journal article supplement (https://acs.figshare.com/ndownloader/files/3900835)
Supplement: Supplementary file 1 [file 3900835]

## Supporting information

### Binding Mode Investigations on the Interaction of lead (II) Acetate with Human Chorionic Gonadotropin

Hao Zhang<sup>a</sup>, Yang Liu<sup>a</sup>, Rui Zhang<sup>a</sup>, Rutao Liu<sup>a,\*</sup>, Yadong Chen<sup>b</sup>

<sup>a</sup>School of Environmental Science and Engineering, Shandong University, 27 Shanda  
Nanlu, Jinan 250100, PR China

<sup>b</sup>Laboratory of Molecular Design and Drug Discovery, School of Basic Science,  
China Pharmaceutical University, 24 Tongjiaxiang, Nanjing 210009, China.

\*All correspondence should be addressed to:

Rutao Liu

School of Environmental Science and Engineering,  
Shandong University, Jinan 250100

Phone/Fax: 86-531-88364868

Email: [rutaoliu@sdu.edu.cn](mailto:rutaoliu@sdu.edu.cn)

P.R. China

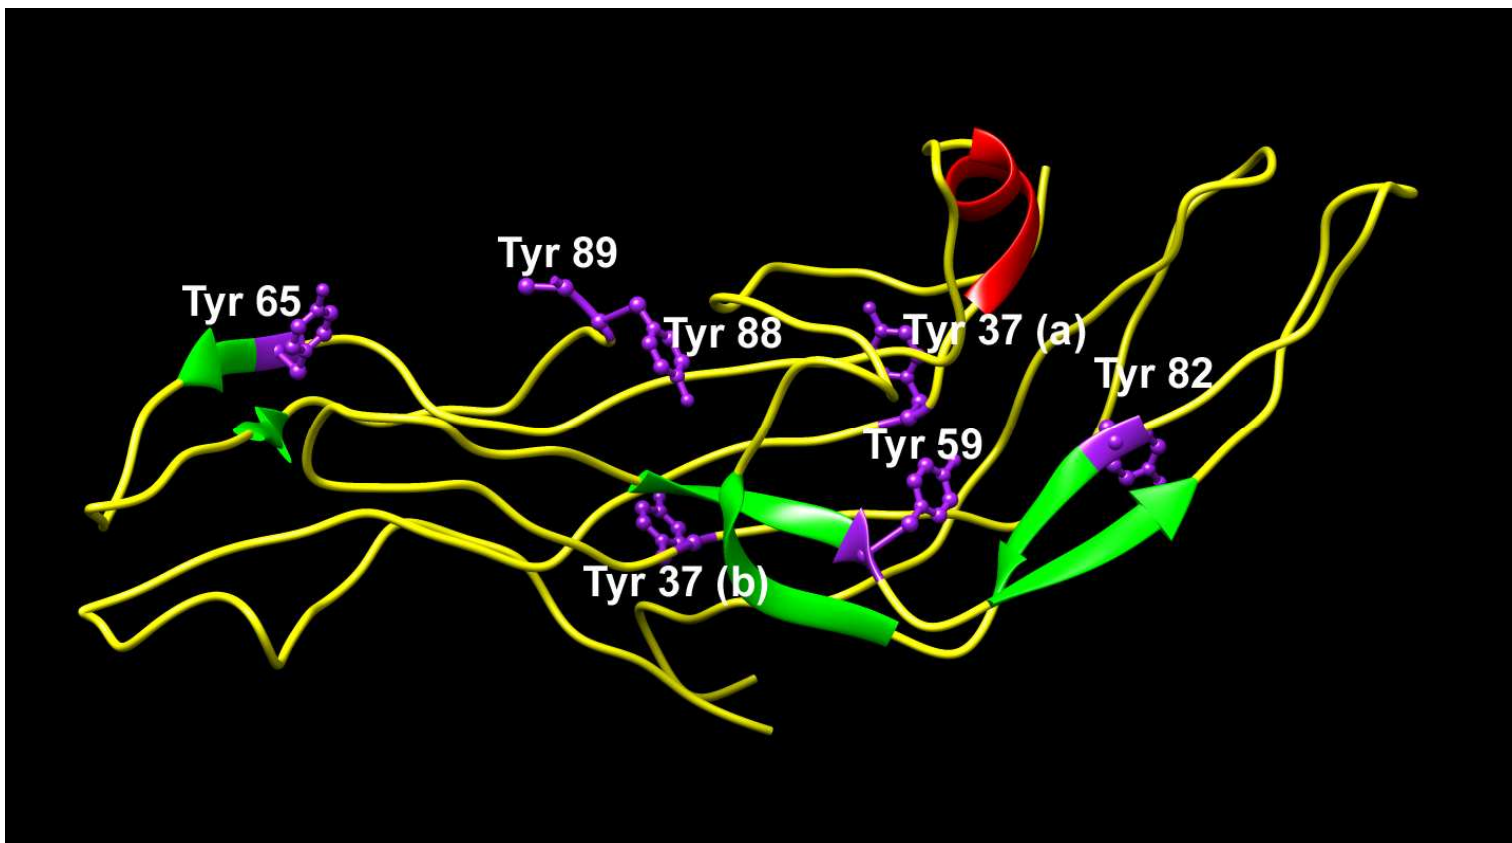

**Fig. S1: Molecular structure of HCG (PDB code 1HRP). Different types of the secondary structure of HCG are color-coded as follows:  $\alpha$ -helix: red,  $\beta$ -pleated sheet: green,  $\beta$ -turn and random coil: yellow. Tyr residues are also marked in purple.**

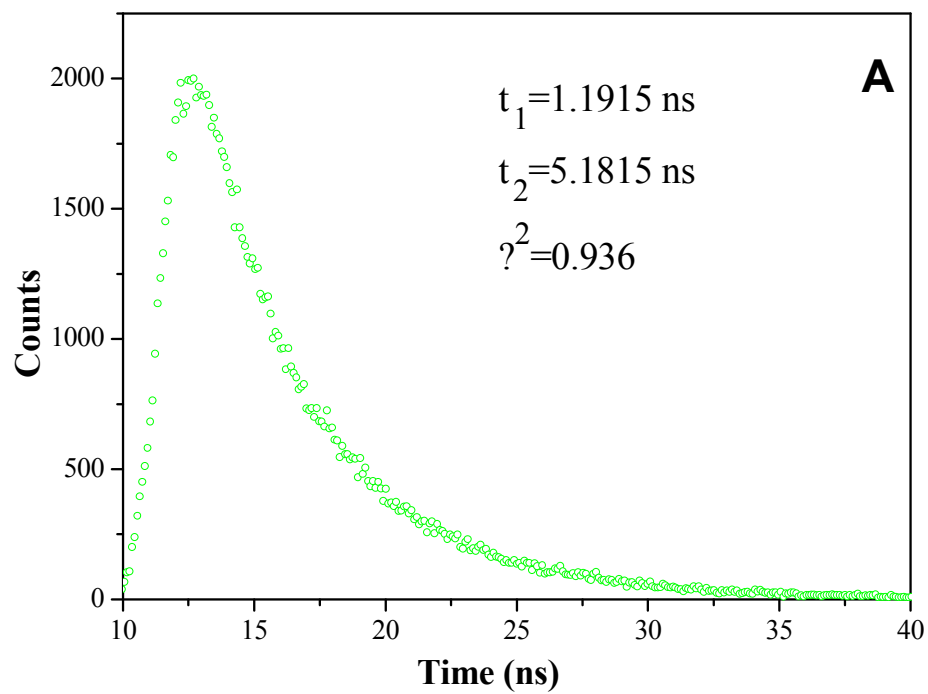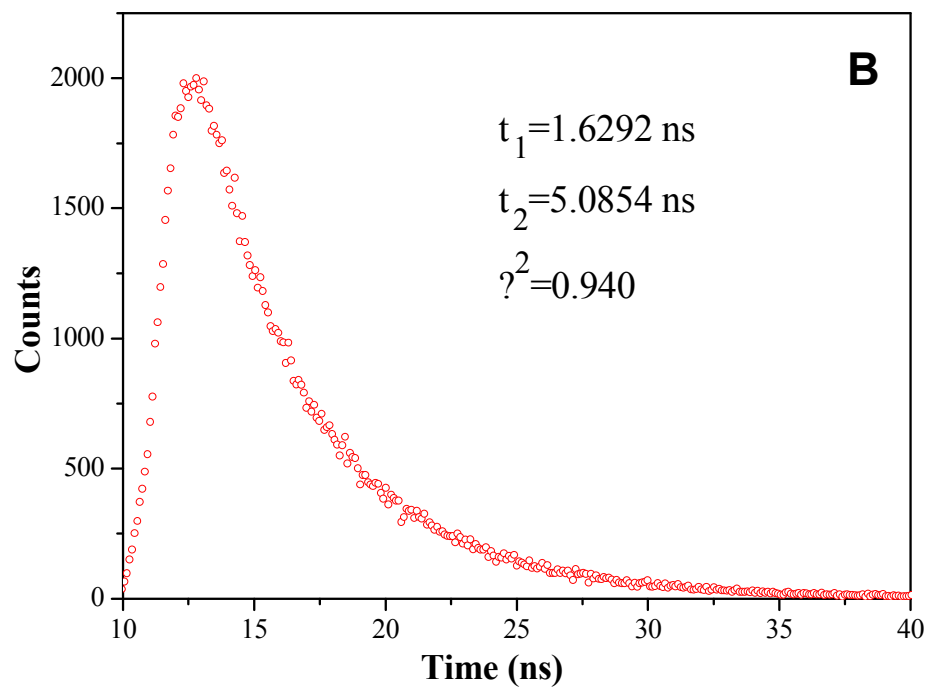

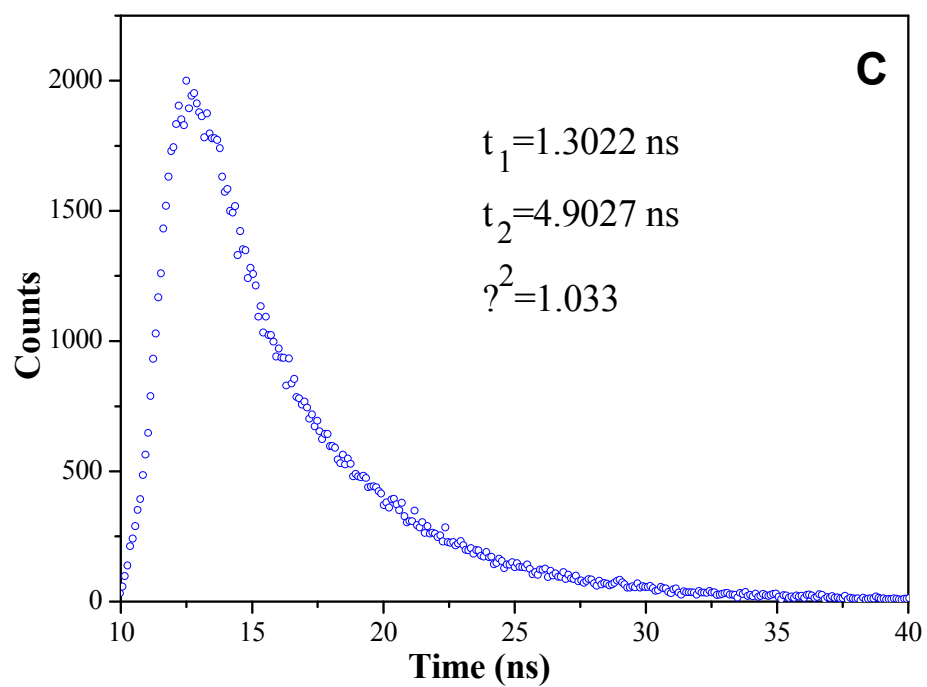

**Fig. S2: Time-resolved fluorescence decay profiles of HCG in the presence of lead.**  
**Conditions: HCG:  $2.7 \times 10^{-6}$  mol/L;  $\text{Pb}(\text{Ac})_2 / (10^{-5}$  mol/L) (a-e): 0, 4, 10; pH=5.5;**  
**T=298 K.**

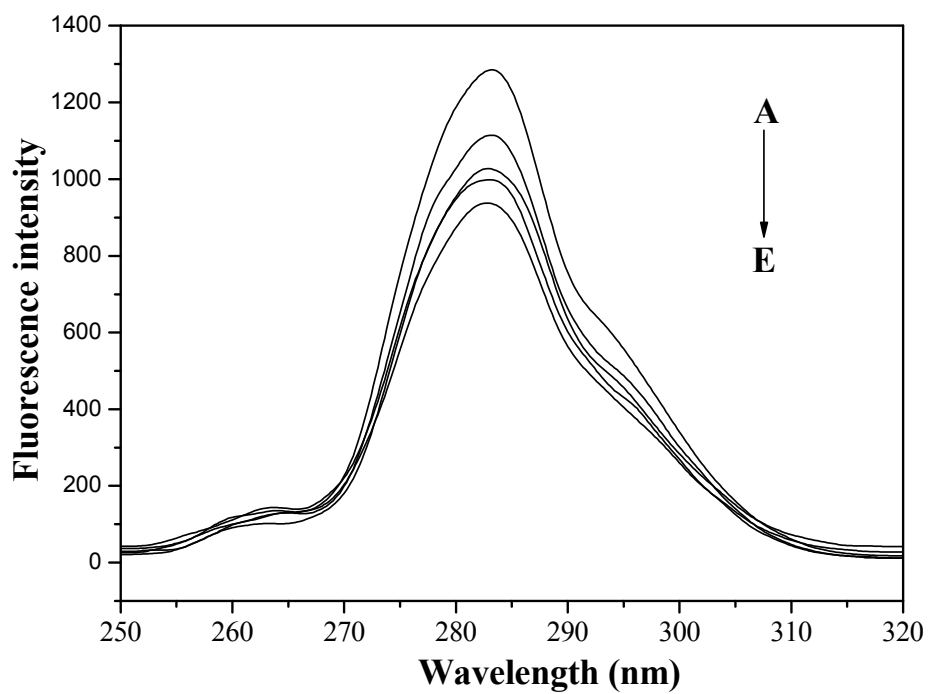

**Fig. S3:** synchronous fluorescence spectra ( $\Delta\lambda = 15$  nm) of HCG in the presence of lead acetate. Conditions: HCG:  $2.7 \times 10^{-6}$  mol/L;  $\text{Pb}(\text{Ac})_2 / (10^{-5}$  mol/L) (a-e): 0, 1, 4, 7, 10; pH=5.5; T=298 K.

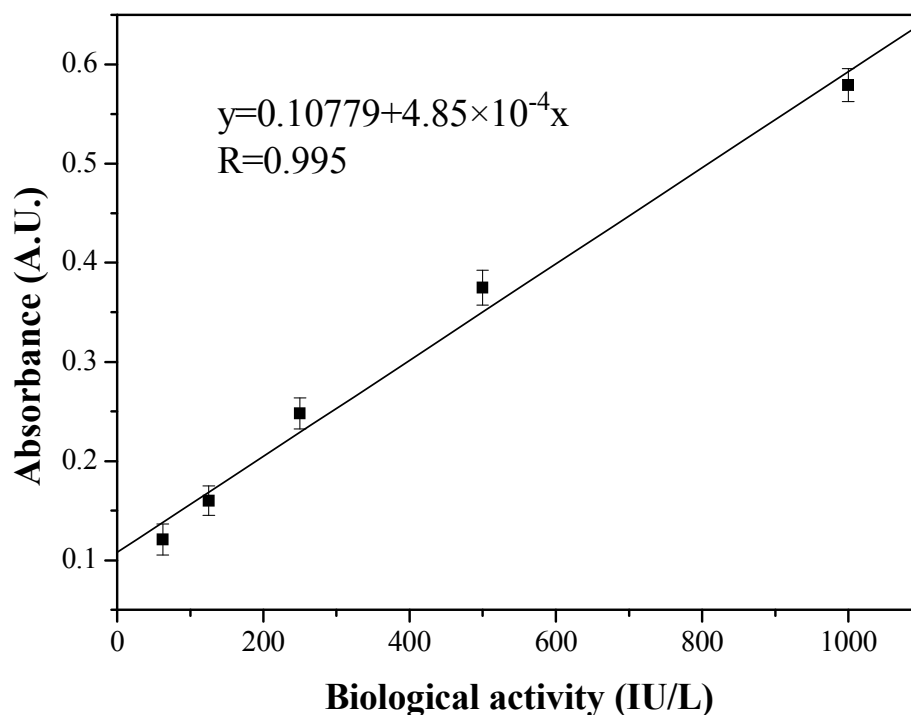

**Fig. S4: Standard curve of HCG biological activities in the range of 0-1000 IU/L by ELISA.**

**S5: Why lead acetate ( $\text{Pb}(\text{Ac})_2$ ) has been chosen for this study?**

There are three soluble lead salts:  $\text{Pb}(\text{Ac})_2$ ,  $\text{PbCl}_2$ ,  $\text{Pb}(\text{NO}_3)_2$ , which can be easily bought. We also need to choose proper buffer solutions to control acidity in the experiments.  $\text{Pb}(\text{NO}_3)_2$  is an explosive and reactive compound, So  $\text{Pb}(\text{Ac})_2$  with HAc-NaAc and  $\text{PbCl}_2$  with Tris-HCl seem the reasonable choices used in this work, because lead toxicity is what we care about.  $\text{PbCl}_2$  is poorly soluble in Tris-HCl (pH=7.4) solution, and  $\text{Pb}(\text{Ac})_2$  is easily soluble in HAc-NaAc buffer. At last we choose  $\text{Pb}(\text{Ac})_2$  in our study.

The isoelectric point of HCG is 2.95, so HCG is negatively charged in our experiments (pH=5.5), and the acetate anion can poorly affect the HCG conformation in our opinion. Considering these factors above,  $\text{Pb}(\text{Ac})_2$  with HAc-NaAc was selected in our study.
